# Supplementary material for: Fe(iii)-carboxythiolate layered metal–organic frameworks with interest as active materials for rechargeable alkali-ion batteries
Source: Royal Society of Chemistry journal article supplement (doi:10.1039/d3ta05353a), 2023-01-01
Supplement: d3ta05353a1.pdf [file d3ta05353a1.pdf]

## SUPPORTING INFORMATION

# Fe(III)-carboxythiolate layered Metal-Organic Frameworks with potential interest as active materials for rechargeable alkali-ion batteries

*Nusik Gedikoglu,<sup>a,‡</sup> Pablo Salcedo-Abraira,<sup>a,‡</sup> Long H.B. Nguyen,<sup>b,d</sup> Nathalie Guillou,<sup>c</sup> Nicolas Dupré,<sup>a</sup> Christophe Payen,<sup>a</sup> Nicolas Louvain,<sup>b,d</sup> Lorenzo Stievano,<sup>b,d</sup> Philippe Poizot,<sup>a</sup> and Thomas Devic<sup>a\*</sup>*

- a. Nantes Université, CNRS, Institut des Matériaux de Nantes Jean Rouxel, IMN, F-44000 Nantes, France.
- b. ICGM, Univ. Montpellier, CNRS, ENSCM, Montpellier, France
- c. Institut Lavoisier de Versailles, UMR CNRS 8180, Université de Versailles St-Quentin en Yvelines, Université Paris Saclay, 78035 Versailles, France.
- d. Réseau sur le Stockage Electrochimique de l'Energie (RS2E), FR CNRS 3459, Amiens, France

## 1. Synthesis of H<sub>4</sub>DSBDC

2,5-disulfhydrylbenzene-1,4-dicarboxylic acid (H<sub>4</sub>DSBDC) was synthesized based on the procedure published by Vial et al.<sup>1</sup>

<sup>1</sup>H NMR (300MHz, DMSO-d<sub>6</sub>): δ (ppm) = 8.03 (s, 2H, Ar-H); <sup>13</sup>C NMR (500MHz, DMSO-d<sub>6</sub>): δ (ppm) = 166.67, 133.16, 133.14, 130.00.

FTIR (Diamond-ATR, cm<sup>-1</sup>): 2958 (m, b), 2863 (m, b), 2815 (m, b), 2646 (m), 2545 (m), 2506 (m), 1685 (vs), 1474 (m), 1409 (s), 1349 (w), 1295 (m), 1251 (s), 1148 (w), 1094 (w), 974 (w), 925 (w), 904 (m), 782 (m), 635 (m), 554 (w), 510 (w), 435 (w);

MS (ESI, m/z): 229 (M-H<sup>-</sup>, 100%).

Elemental analysis calculated for C<sub>8</sub>H<sub>6</sub>O<sub>4</sub>S<sub>2</sub>: C, 41.72; H, 2.63; S, 27.85. Found: C, 41.77; H, 2.59; S, 27.69.

## 2. Chemical analysis of the MOFs

The purity of each phase was assessed by a combination of elemental analysis (C, H, S) and ICP-AES (Fe, Na, K). Values are given in wt%, with their standard deviation based on multiple analyses

(DMA){Fe(DSBDC)}: theo. C 36.59, H 3.07, N 4.26, S 19.54, O 19.50, Fe 17.01; exp. C 36.4 ± 0.1, H 3.06 ± 0.01, N 4.59 ± 0.03, S 14.6 ± 2.2, Fe 17.0 ± 0.2;

Na{Fe(DSBDC)}·2.5H<sub>2</sub>O theo. C 27.44, H 2.01, S 18.31, O 29.70, Fe 15.95, Na 6.56; exp. C 27.19 ± 0.04, H 1.83 ± 0.01, S 16.7 ± 0.8, Fe 16.5 ± 0.2, Na 6.17 ± 0.1;

K{Fe(DSBDC)}·nH<sub>2</sub>O theo. C 26.23, H 1.92, S 17.51, O 28.39, Fe 15.24, K 10.67; exp. C 25.63 ± 0.06, H 1.63 ± 0.01, S 16.3 ± 2.8, Fe 15.9 ± 0.2, K 11.9 ± 0.5.

### 3. Structural characterization

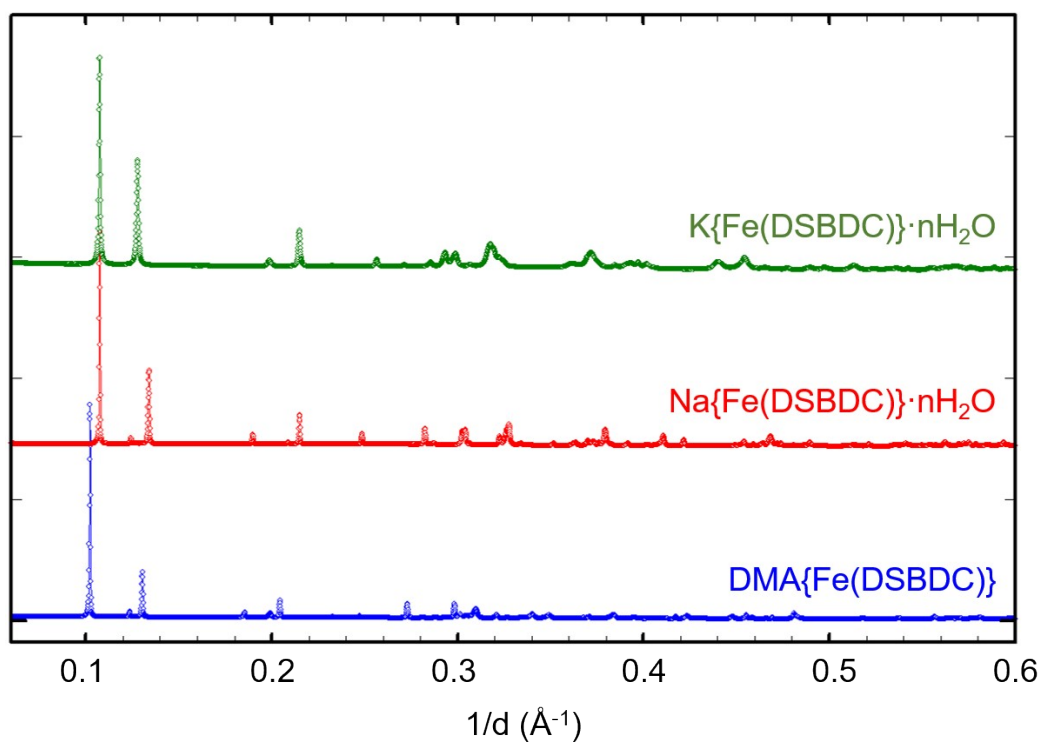

**Figure S1.** PXRD patterns of  $(\text{DMA})\{\text{Fe}(\text{DSBDC})\}$ ,  $\text{Na}\{\text{Fe}(\text{DSBDC})\}\cdot 2.5\text{H}_2\text{O}$  and  $\text{K}\{\text{Fe}(\text{DSBDC})\}\cdot n\text{H}_2\text{O}$ .

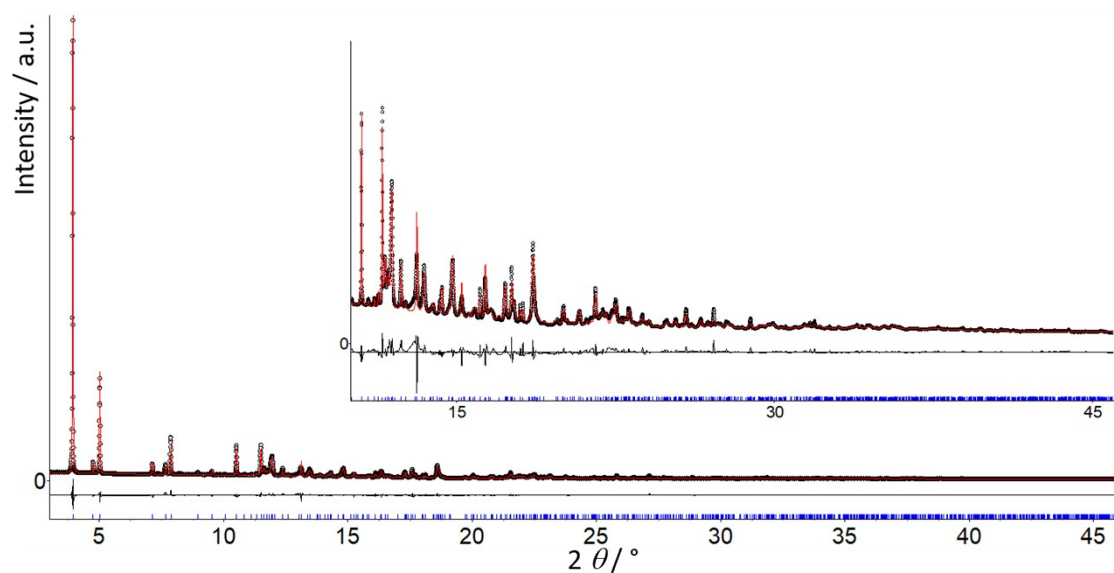

**Figure S2.** Rietveld plot of  $(\text{DMA})\{\text{Fe}(\text{DSBDC})\}$  using the SCXRD structural model, with only refinement of the profile parameters.  $R_{\text{wp}} = 0.064$  and  $R_{\text{Bragg}} = 0.026$  ( $\lambda_{\text{synchrotron}} = 0.671415\text{\AA}$ ).

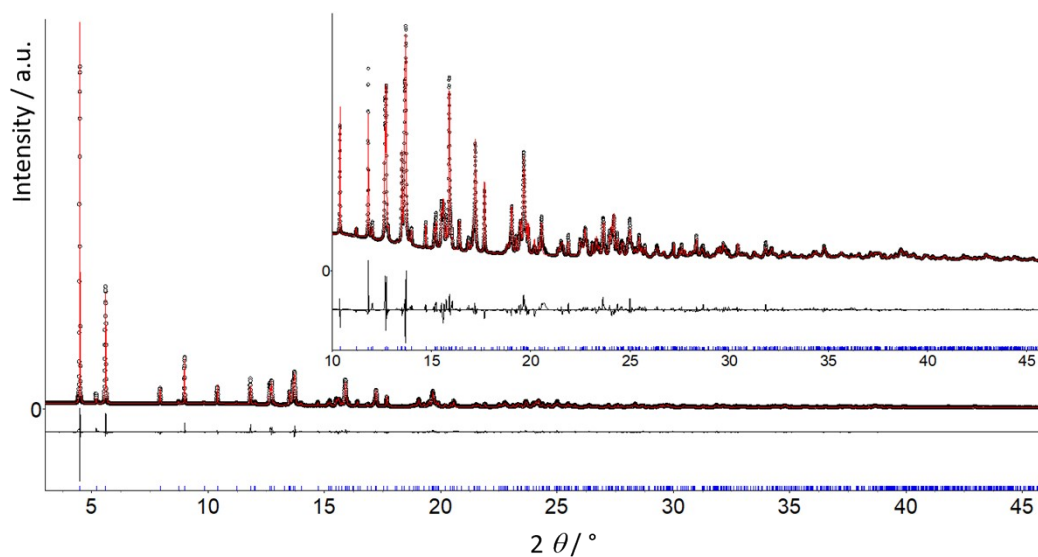

**Figure S3.** Final Rietveld plot of  $\text{Na}\{\text{Fe}(\text{DSBDC})\}\cdot 2.5\text{H}_2\text{O}$ .  $R_{\text{wp}} = 0.051$  and  $R_{\text{Bragg}} = 0.038$  ( $\lambda_{\text{synchrotron}} = 0.72890 \text{ \AA}$ ).

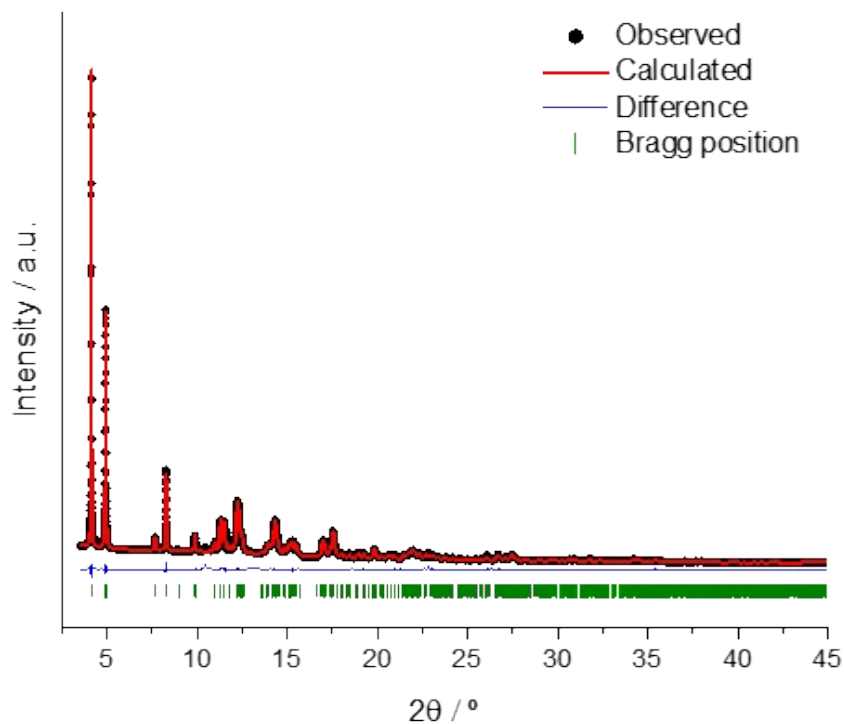

**Figure S4.** Whole structureless powder pattern fitting of  $\text{K}\{\text{Fe}(\text{DSBDC})\}\cdot n\text{H}_2\text{O}$ .  $R_{\text{wp}} = 0.030$  ( $\lambda_{\text{synchrotron}} = 0.671415 \text{ \AA}$ ).

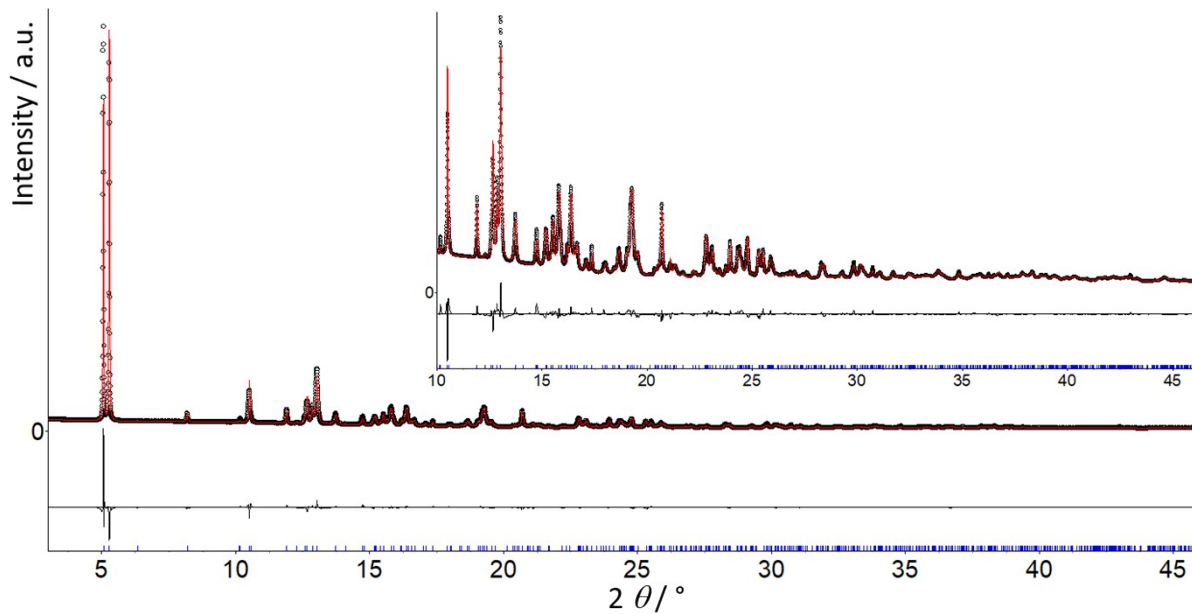

**Figure S5.** Final Rietveld plot of  $\text{Na}\{\text{Fe}(\text{DSBDC})\}$ .  $R_{\text{wp}} = 0.036$  and  $R_{\text{Bragg}} = 0.040$  ( $\lambda_{\text{synchrotron}} = 0.72890 \text{ \AA}$ ).

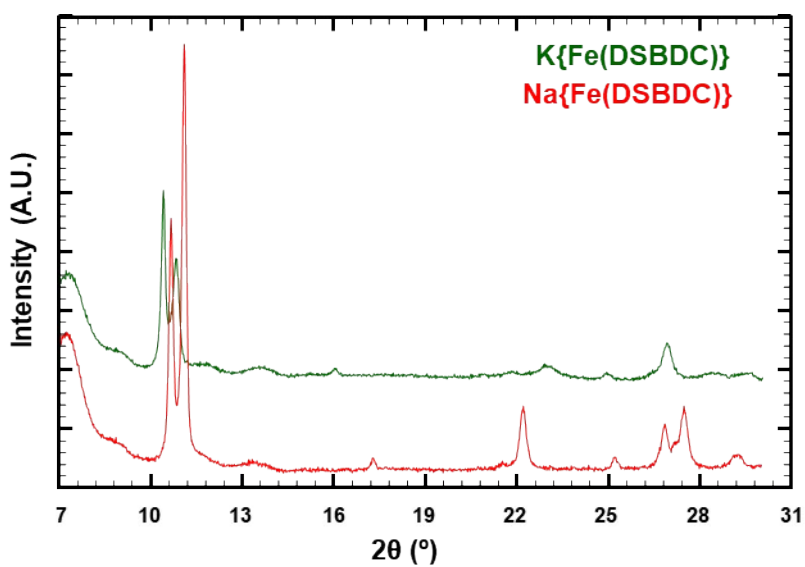

**Figure S6.** Comparison of the PXRD patterns of  $\text{Na}\{\text{Fe}(\text{DSBDC})\}$  and  $\text{K}\{\text{Fe}(\text{DSBDC})\}$  ( $\lambda_{\text{CuK}\alpha} = 1.5418 \text{ \AA}$ ).

**Table S1.** Crystallographic information of (DMA){Fe(DSBDC)}.

|                                               |                                                                  |
|-----------------------------------------------|------------------------------------------------------------------|
| Formula                                       | C <sub>10</sub> H <sub>10</sub> FeNO <sub>4</sub> S <sub>2</sub> |
| Formula weight / g                            | 328.16                                                           |
| Temperature / K                               | 297(2)                                                           |
| Wavelength / Å                                | Mo Kα, 0.71073                                                   |
| Crystal dimensions / mm <sup>3</sup>          | 0.03 x 0.005 x 0.005                                             |
| Crystal system                                | Triclinic                                                        |
| Space group                                   | <i>P</i> -1                                                      |
| <i>a</i> / Å                                  | 3.5583(4)                                                        |
| <i>b</i> / Å                                  | 8.598(2)                                                         |
| <i>c</i> / Å                                  | 10.405 (2)                                                       |
| $\alpha$ / °                                  | 109.90 (2)                                                       |
| $\beta$ / °                                   | 92.47 (1)                                                        |
| $\gamma$ / °                                  | 91.71 (1)                                                        |
| <i>V</i> / Å <sup>3</sup>                     | 298.71(8)                                                        |
| <i>Z</i> (molecules / cell)                   | 1                                                                |
| <i>D</i> <sub>calc</sub> / g cm <sup>-3</sup> | 1.824                                                            |
| Absorption coefficient / mm <sup>-1</sup>     | 1.615                                                            |
| F(000)                                        | 167                                                              |
| Theta range for data collection               | 3.784 to 26.331                                                  |
| Index ranges                                  | -4 ≤ <i>h</i> ≤ 4                                                |
|                                               | -10 ≤ <i>k</i> ≤ 10                                              |
|                                               | -12 ≤ <i>l</i> ≤ 12                                              |
| Reflections collected                         | 8852                                                             |
| Independent reflections                       | 1227                                                             |
| Completeness to theta = 25.24°                | 99.7%                                                            |
| Max. and min. transmission                    | 1.0000, 0.2926                                                   |
| Data / restraints / parameters                | 1227/3/82                                                        |
| Goodness-of-fit on F <sup>2</sup>             | 1.215                                                            |
| Final R indices [I>2sigma(I)]                 | <i>R</i> <sub>1</sub> , w <i>R</i> <sub>2</sub> = 0.1231, 0.2505 |
| R indices (all data)                          | <i>R</i> <sub>1</sub> , w <i>R</i> <sub>2</sub> = 0.1578, 0.2644 |
| Largest diff. peak and hole                   | 0.908, -0.773                                                    |

**Table S2.** Crystallographic information of Na{Fe(DSBDC)}·2.5H<sub>2</sub>O and Na{Fe(DSBDC)}.

| Compound                  | Na{Fe(DSBDC)}·2.5H <sub>2</sub> O | Na{Fe(DSBDC)} |
|---------------------------|-----------------------------------|---------------|
| Crystal system            | Triclinic                         | Triclinic     |
| Wavelength / Å            | 0.72890                           | 0.72890       |
| Space group               | <i>P</i> -1                       | <i>P</i> -1   |
| <i>a</i> / Å              | 3.5487(1)                         | 3.55430(4)    |
| <i>b</i> / Å              | 8.5445(2)                         | 8.5345(1)     |
| <i>c</i> / Å              | 10.0485(2)                        | 10.2606 (1)   |
| $\alpha$ / °              | 109.249(2)                        | 128.8186(7)   |
| $\beta$ / °               | 100.613(2)                        | 95.899(1)     |
| $\gamma$ / °              | 90.723(2)                         | 91.179(2)     |
| <i>V</i> / Å <sup>3</sup> | 281.85(2)                         | 239.763(6)    |
| <i>R</i> <sub>wp</sub>    | 0.051                             | 0.036         |
| <i>R</i> <sub>Bragg</sub> | 0.038                             | 0.040         |

**Table S3.** Na-O bond distances and O-Na-O bond angles in Na{Fe(DSBDC)}·2.5H<sub>2</sub>O and Na{Fe(DSBDC)}.

| Compound                          | Na{Fe(DSBDC)}·2.5H <sub>2</sub> O | Na{Fe(DSBDC)} |
|-----------------------------------|-----------------------------------|---------------|
|                                   | Bond length / Å                   |               |
| Na1-O2 (-COO)                     | 2.364(5)                          | 2.451(4)      |
| Na1-O2B (-COO)                    | 2.390(4)                          | 2.364(4)      |
| Na1-O1 (-COO)                     |                                   | 2.523(4)      |
| Na1-Ow1 (H <sub>2</sub> O)        | 2.467(5)                          |               |
|                                   | Bond angle / °                    |               |
| O2-Na1-O2C (chain)                | 83.4(2)                           | 84.9(2)       |
| O1-Na1-O2 (chelating carboxylate) |                                   | 53.6(1)       |

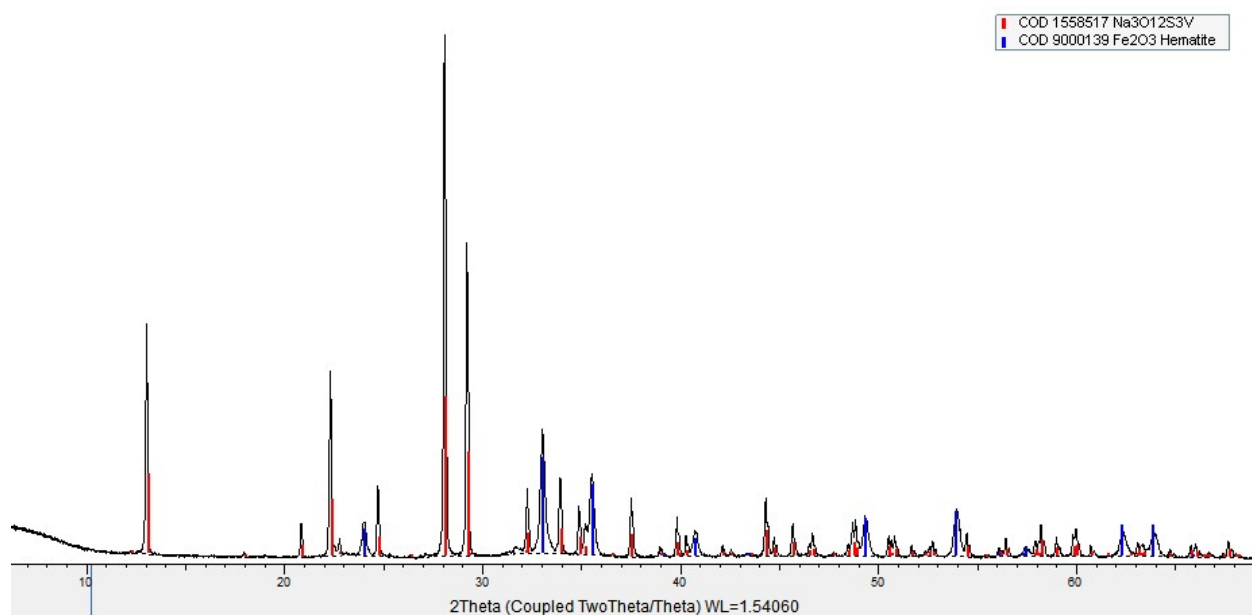

**Figure S7.** PXRD pattern of the combustion product of  $\text{Na}\{\text{Fe}(\text{DSBDC})\} \cdot 2.5\text{H}_2\text{O}$  after calcination at  $500^\circ\text{C}$  in air. Mixture is composed of  $\text{Na}_3\text{Fe}(\text{SO}_4)_3$  (no CIF available),  $\text{Fe}_2\text{O}_3$  (COD 9000139), and small amounts of unidentified phase ( $\lambda_{\text{CuK}\alpha} = 1.5406 \text{ \AA}$ ).

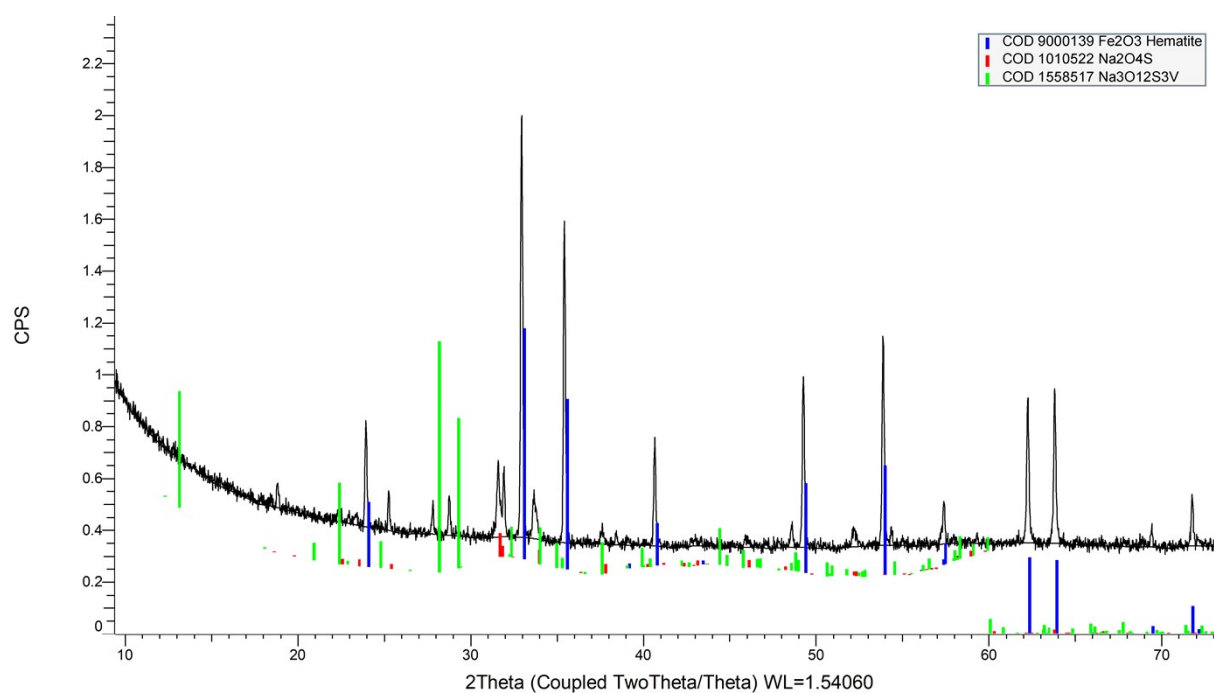

**Figure S8.** PXRD pattern of the combustion product of  $\text{Na}\{\text{Fe}(\text{DSBDC})\} \cdot 2.5\text{H}_2\text{O}$  after calcination at  $1000^\circ\text{C}$  in air. Mixture is composed of  $\text{Fe}_2\text{O}_3$  (COD 9000139),  $\text{Na}_2\text{SO}_4$ ,  $\text{Na}_3\text{Fe}(\text{SO}_4)_3$  and possibly other phases ( $\lambda_{\text{CuK}\alpha} = 1.5406 \text{ \AA}$ ).



#### 4. $^1\text{H}$ liquid NMR

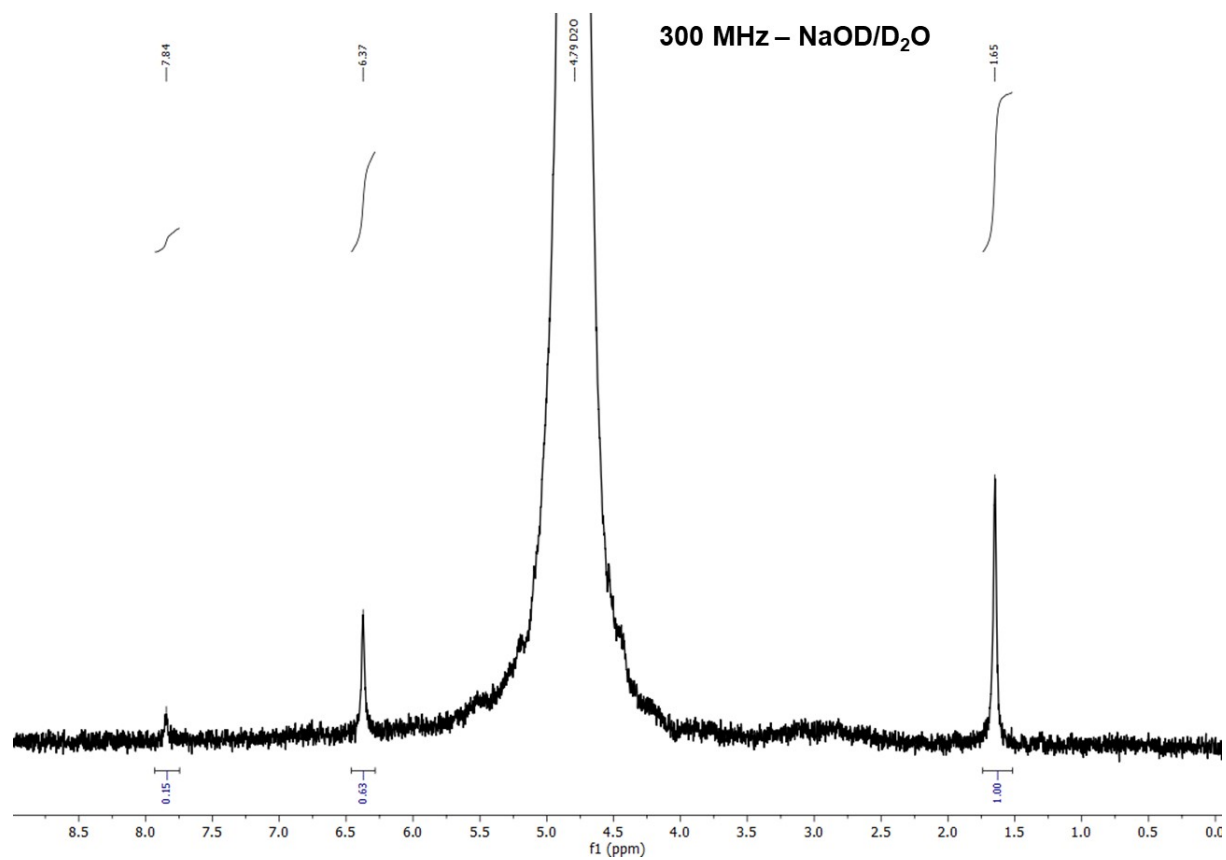

**Figure S9.**  $^1\text{H}$  NMR spectrum of the degradation product of  $\text{DMA}\{\text{Fe}(\text{DSBDC})\}$  in  $\text{NaOD}/\text{D}_2\text{O}$ . Signals at 7.84, 6.37 and 1.65 are attributed to N-H (DMA), C-H (DSBDC) and  $\text{CH}_3$  (DMA).

## 5. Scanning electron microscopy and electron dispersive spectroscopy

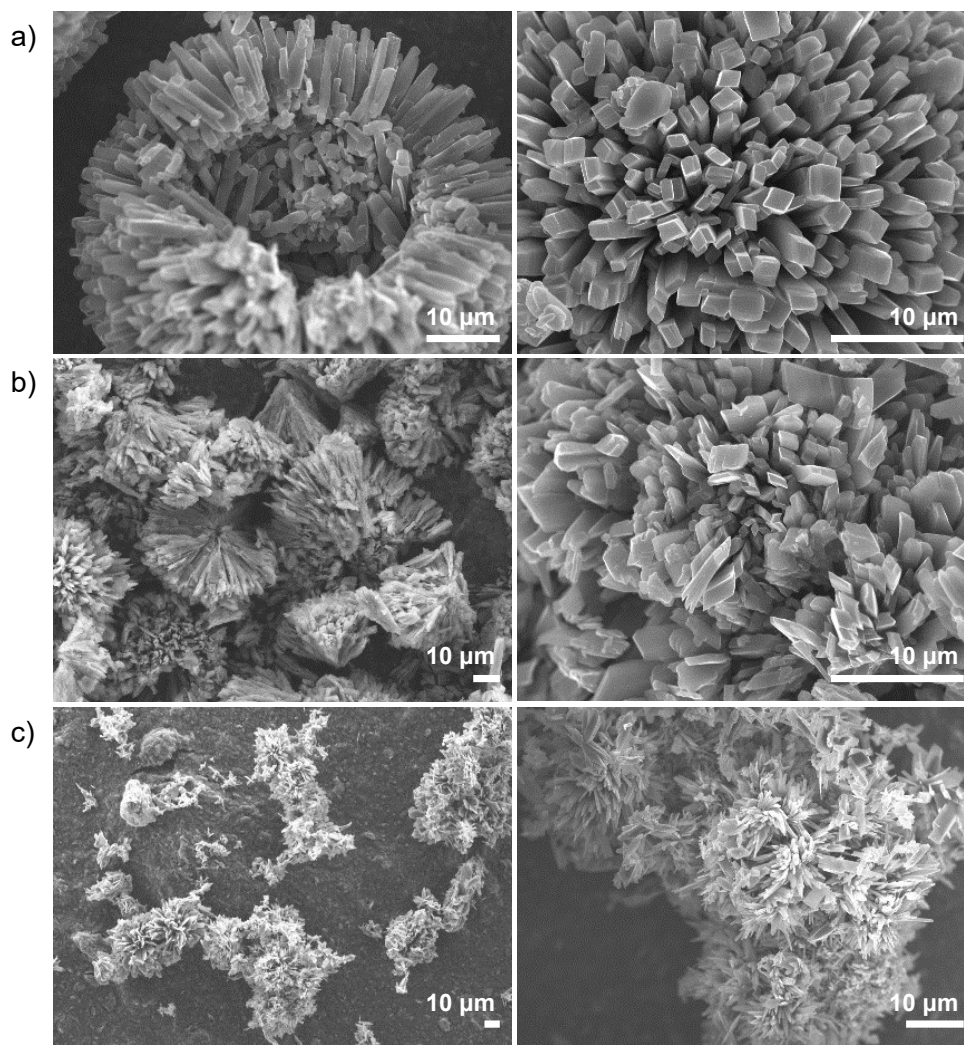

**Figure S10.** Scanning Electron microscopy images of a)  $(DMA)\{Fe(DSBDC)\}$ , b)  $Na\{Fe(DSBDC)\} \cdot 2H_2O$  and c)  $K\{Fe(DSBDC)\} \cdot nH_2O$ .

**Table S4.** Average atomic percentage of heavy elements (Fe, S, Na, K) in the three solids.

| Compound                        | Fe (at %) | S (at %) | Na (at %) | K (at %) | Deduced Na,K/Fe/DSBDC |
|---------------------------------|-----------|----------|-----------|----------|-----------------------|
| $(DMA)\{Fe(DSBDC)\}$            | 3.30      | 6.88     | -         | -        | -/1.00/1.04           |
| $Na\{Fe(DSBDC)\} \cdot 2.5H_2O$ | 4.51      | 9.00     | 4.80      | -        | 1.06/1.00/1.00        |
| $K\{Fe(DSBDC)\} \cdot nH_2O$    | 5.43      | 10.66    | -         | 6.20     | 1.14/1.00/0.98        |

## 6. Infrared spectroscopy

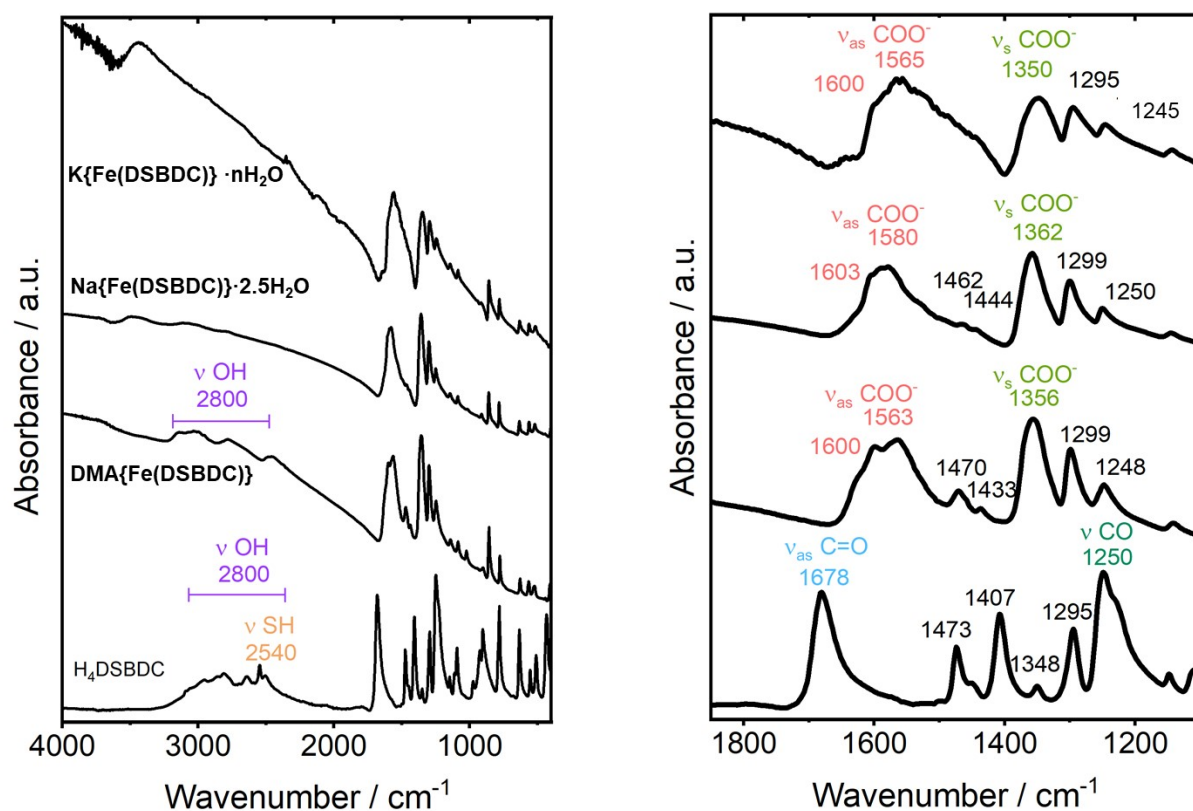

**Figure S11.** FTIR spectra of  $H_4DSBDC$ ,  $(DMA)\{Fe(DSBDC)\}$ ,  $Na\{Fe(DSBDC)\} \cdot 2.5H_2O$  and  $K\{Fe(DSBDC)\} \cdot nH_2O$ .

**Table S5.** IR vibrational bands (in  $cm^{-1}$ ) and proposed assignments for  $H_4DSBDC$ ,  $(DMA)\{Fe(DSBDC)\}$ ,  $Na\{Fe(DSBDC)\} \cdot 2.5H_2O$ .

| $H_4DSBDC$   |                               | $(DMA)\{Fe(DSBDC)\}$ |                               | $Na\{Fe(DSBDC)\} \cdot 2.5H_2O$ |                      |
|--------------|-------------------------------|----------------------|-------------------------------|---------------------------------|----------------------|
| 2540         | $\nu_s SH$                    |                      |                               |                                 |                      |
| <b>1678*</b> | $\nu_{as} C=O$                | <b>1544</b>          | $\nu_{as} COO^-$              | <b>1568</b>                     | $\nu_{as} COO^-$     |
| 1473         | $\nu_s CC, \nu_s CO$          | 1468                 | $\nu_s CC, \nu_s CO$          | 1453                            | $\nu_s CC$           |
| 1407         | $\nu_s CC, \nu_s CO$          | 1433                 | $\nu_s CC, \nu_s CO$          | 1444                            | $\nu_s CC$           |
| 1348         | $\nu_s CC, \nu_s CO$          | <b>1342</b>          | $\nu_s COO^-$                 | <b>1350</b>                     | $\nu_s COO^-$        |
|              | $\nu_s CC, \nu_s CO-H, \nu_s$ |                      | $\nu_s CC, \nu_s CO-H, \nu_s$ |                                 |                      |
| 1295         | CO                            | 1299                 | CO                            | 1299                            | $\nu_s CC, \nu_s CO$ |
| <b>1250</b>  | $\nu_s CO, \nu_s CC$          | 1248                 | $\nu_s CC$                    | 1250                            | $\nu_s CC$           |

\*most intense peaks are highlighted bold.

## 7. Thermogravimetric analyses (TGA)

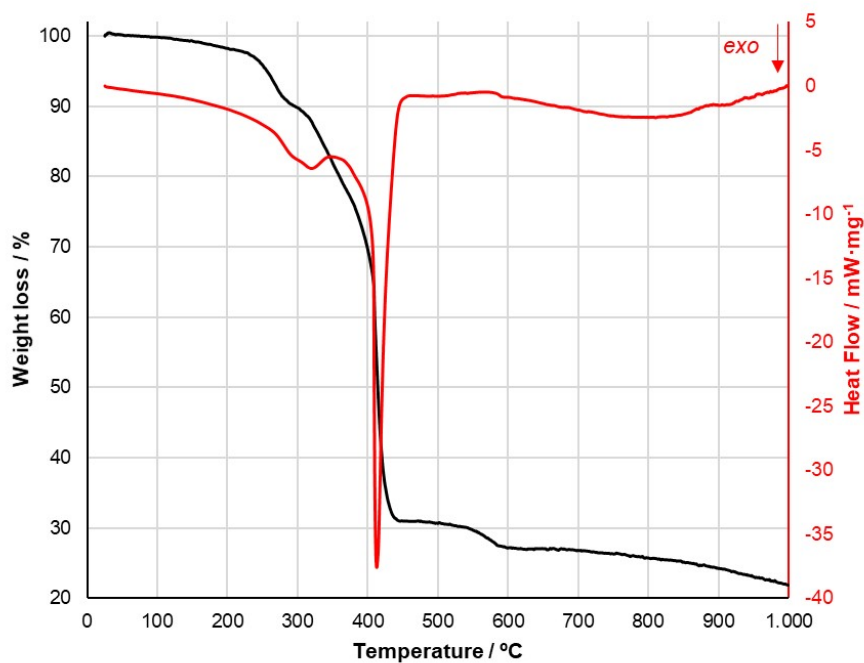

**Figure S12.** TG-DSC curves of (DMA){Fe(DSBDC)} measured under air at 5°C min<sup>-1</sup>.

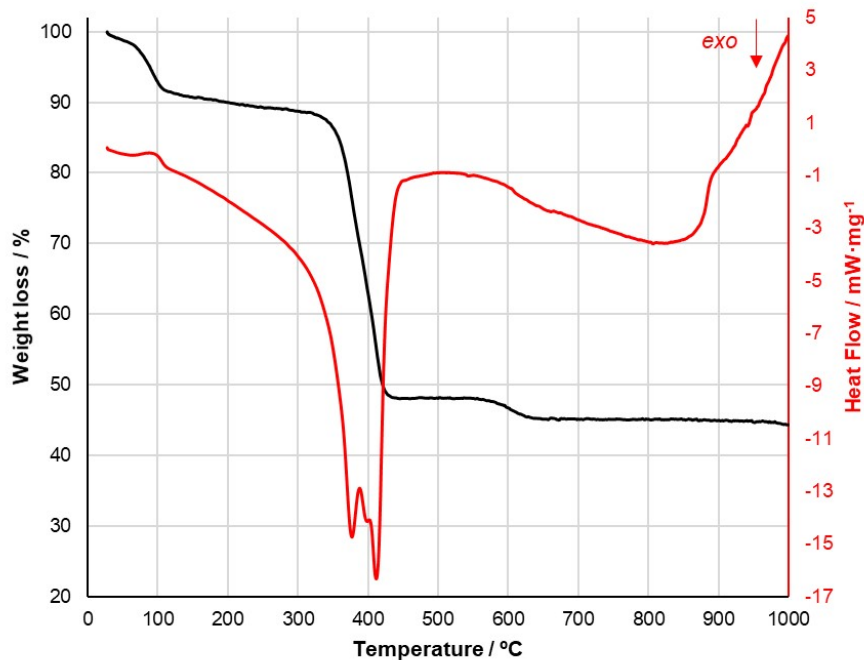

**Figure S13.** TG-DSC curves of Na{Fe(DSBDC)}·2.5H<sub>2</sub>O measured under air at 5°C min<sup>-1</sup>.

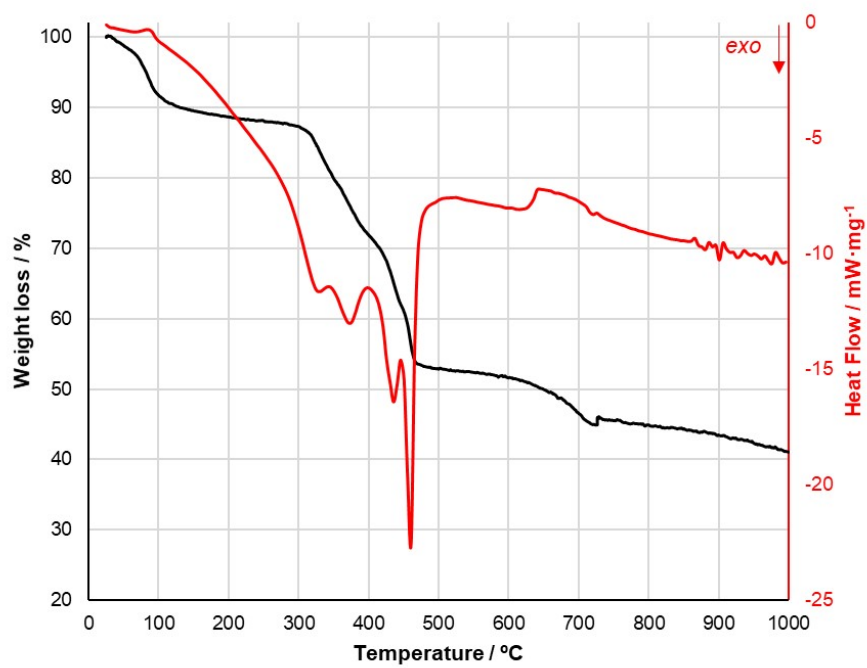

**Figure S14.** TG-DSC curves of  $K\{Fe(DSBDC)\} \cdot nH_2O$  measured under air at  $5^\circ C \text{ min}^{-1}$ .

## 8. Stability tests in DMF, ethanol, and water

The stability of the three solids in DMF, ethanol, and water was evaluated by suspending samples in these solvents and examining signs of degradation at the end of the period by powder X-ray diffraction, infrared spectroscopy and visual inspection of the supernatant. For the tests, 10 mg of solid was suspended in 10 ml of solvent in nearly full closed glass vials. The suspensions were stirred for 1 h, and then left at rest for a determined amount of time. At the end of the period, the compounds were separated from their solvents by centrifugation and washed with ethanol. The isolated samples were characterized by PXRD and IR spectroscopy.

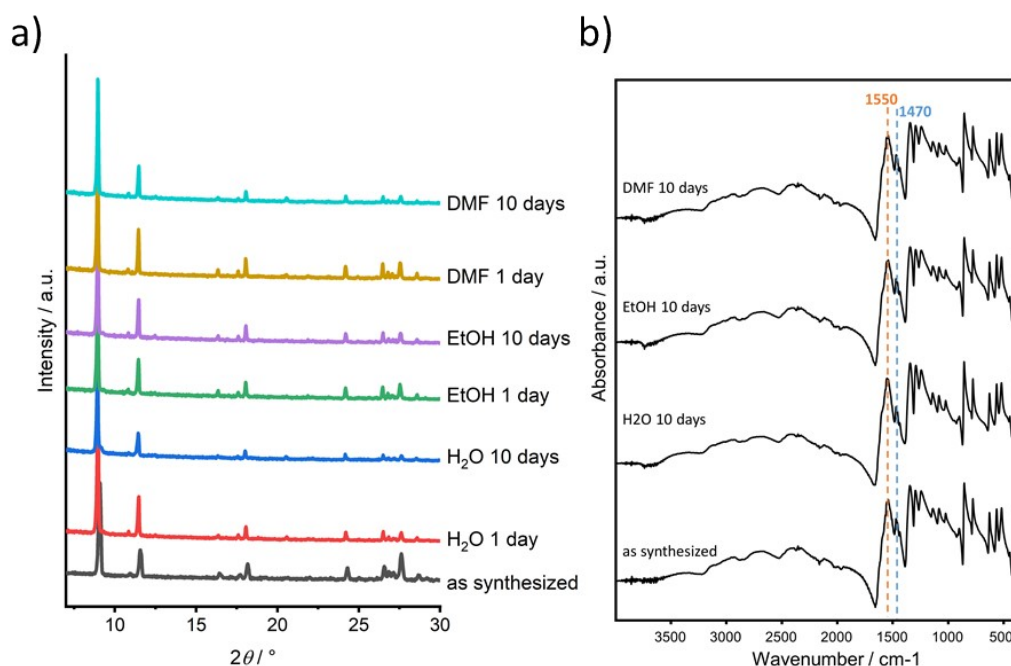

**Figure S15.** PXRD patterns (a) and FTIR spectra (b) after stability tests for (DMA){Fe(DSBDC)}.

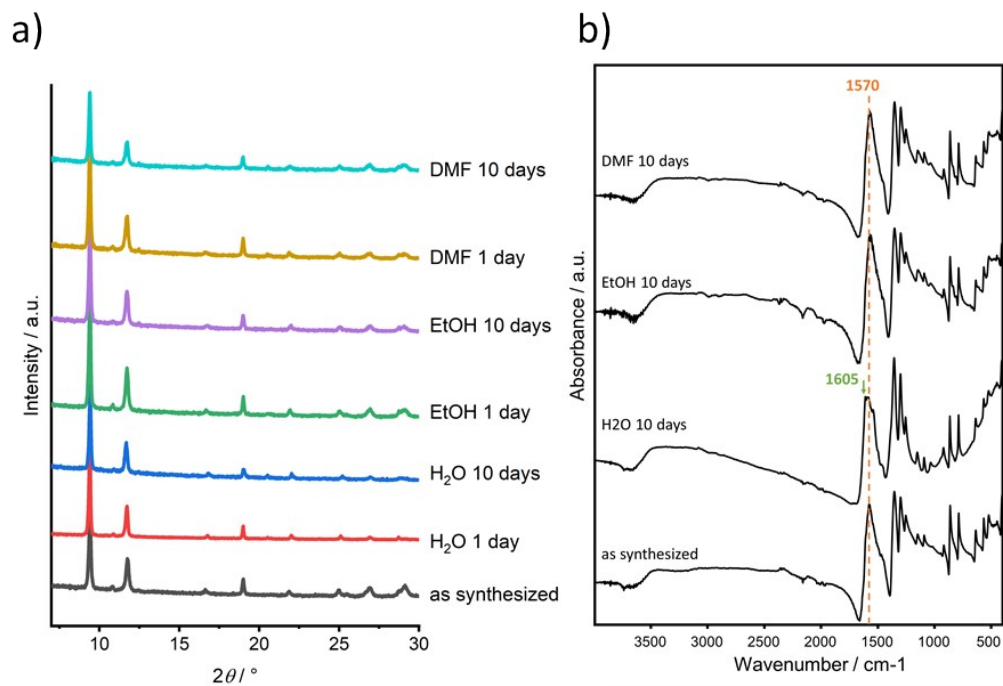

**Figure S16.** PXRD patterns (a) and FTIR spectra (b) after stability tests for Na{Fe(DSBDC)}·2.5H<sub>2</sub>O.

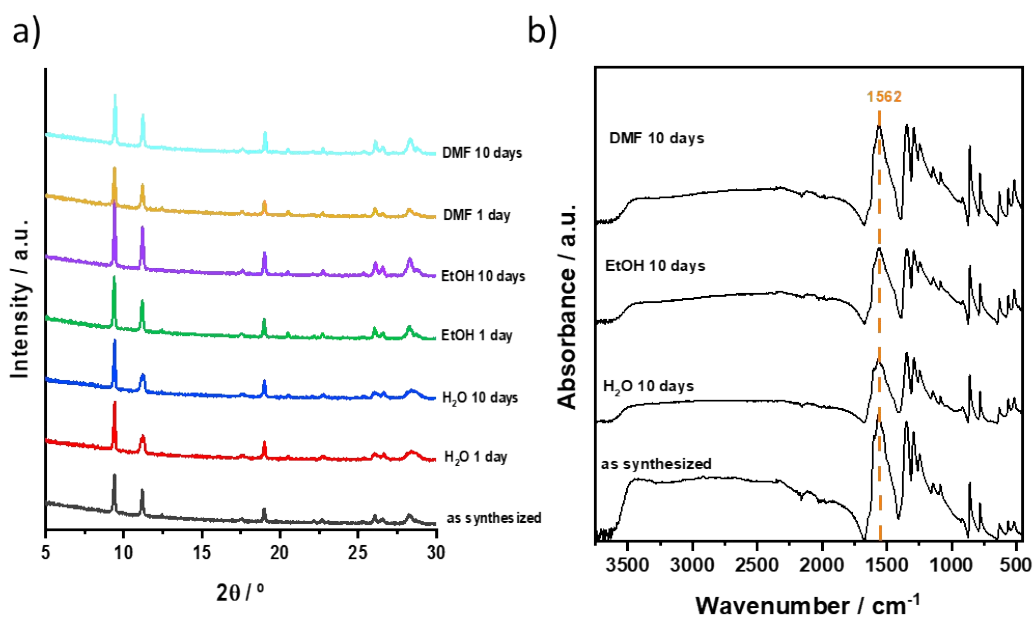

**Figure S17.** PXRD patterns (a) and FTIR spectra (b) after stability tests for K{Fe(DSBDC)}·nH<sub>2</sub>O.

## 9. UV-vis absorption spectroscopy

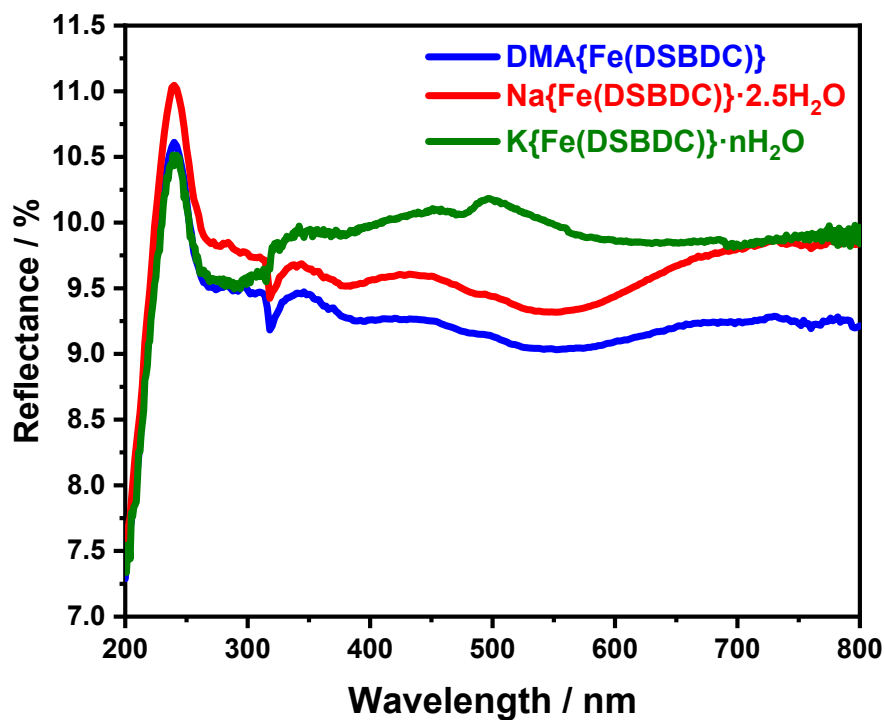

**Figure S18.** Solid-state UV-visible reflectance spectra of  $(\text{DMA})\{\text{Fe}(\text{DSBDC})\}$ ,  $\text{Na}\{\text{Fe}(\text{DSBDC})\}\cdot 2.5\text{H}_2\text{O}$  and  $\text{K}\{\text{Fe}(\text{DSBDC})\}\cdot n\text{H}_2\text{O}$ .

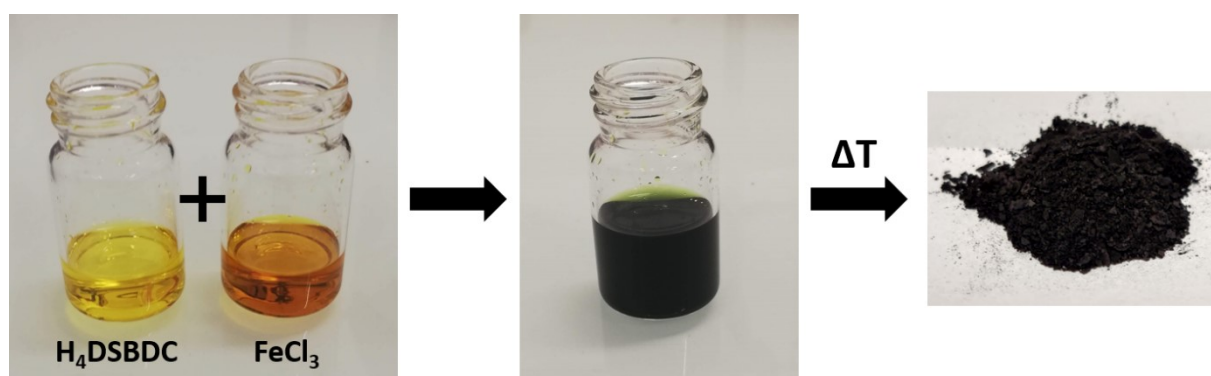

**Figure S19.** Illustration of the colour change occurring upon reaction between  $\text{H}_4\text{DSBDC}$  and  $\text{Fe}(\text{III})$ . Left: initial solution of reactants (in DMF); middle: solution after immediate mixing; right: powder recovered after heating (here  $\text{Na}\{\text{Fe}(\text{DSBDC})\}\cdot 2.5\text{H}_2\text{O}$ ).



## 10. Magnetic susceptibility and Mössbauer spectroscopy

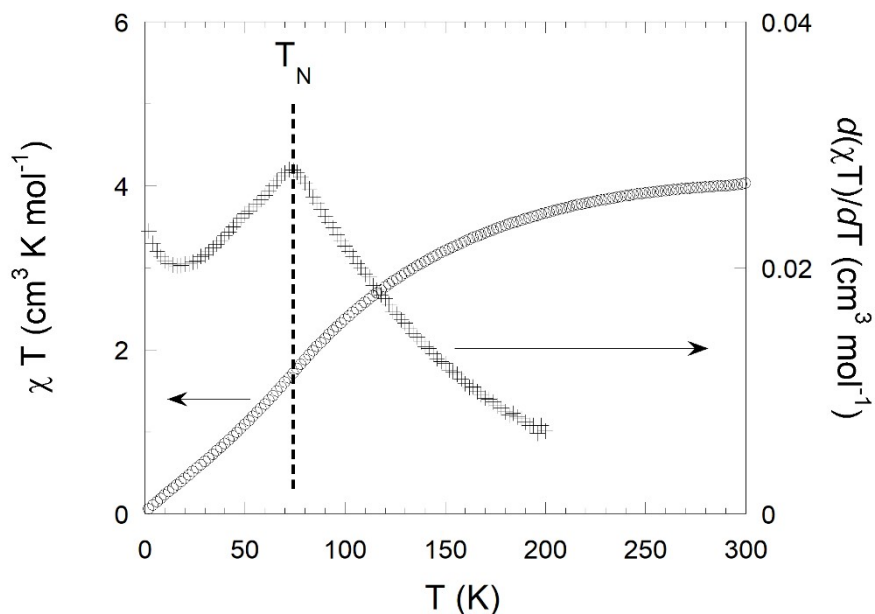

**Figure S20.**  $\chi(T) \cdot T$  product for a Na{Fe(DSBDC)}·2.5H<sub>2</sub>O sample as a function of temperature  $T$  (open circles; left scale). The derivative  $d(\chi(T) \cdot T)/dT$  (plus signs; right scale) is also plotted to highlight the magnetic transition at  $T_N \approx 72$  K.

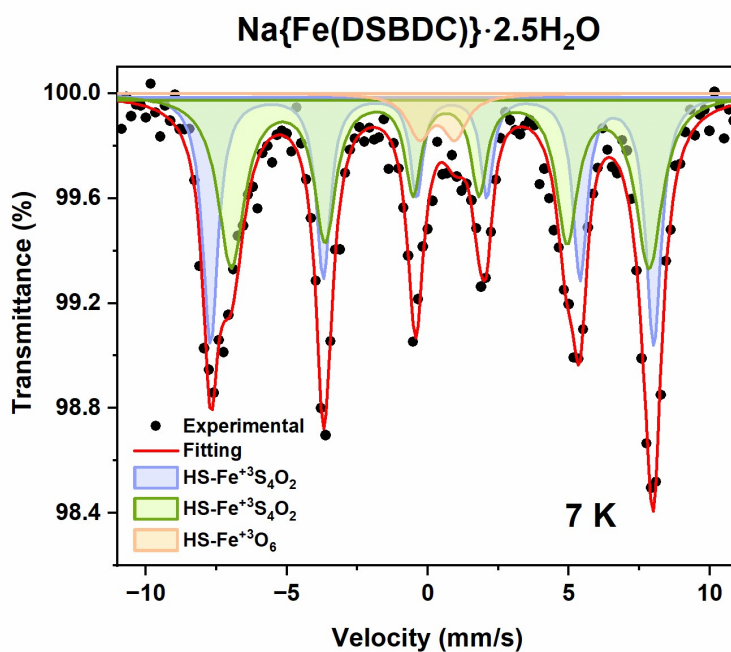

**Figure S21.** Mössbauer spectra of Na{Fe(DSBDC)}·2.5H<sub>2</sub>O recorded at 7K.

**Table S6.** Refined values of hyperfine parameters of  $\text{Na}\{\text{Fe}(\text{DSBDC})\}\cdot 2.5\text{H}_2\text{O}$  at 7K. At low temperature, magnetic ordering runs along the edge-sharing  $\{\text{FeS}_4\text{O}_2\}_n$  chains and  $\text{FeS}_4\text{O}_2$  sites are split into two inequivalent positions. On the other hand,  $\text{FeO}_6$  sites are not affected by this magnetic ordering as they are not in direct contact with  $\{\text{FeS}_4\text{O}_2\}_n$  chains.

|                   | Hyperfine field<br>$B_{\text{hf}}$ (T) | $\Delta$ ( $\text{mm}\cdot\text{s}^{-1}$ ) | $\delta$ ( $\text{mm}\cdot\text{s}^{-1}$ ) | Area (%) | Assignment                              |
|-------------------|----------------------------------------|--------------------------------------------|--------------------------------------------|----------|-----------------------------------------|
| Sextet # 1 (Blue) | 48.76                                  | -0.70                                      | 0.61                                       | 43       | $\text{HS-Fe}^{+3}\text{S}_4\text{O}_2$ |
| Sextet #2 (Green) | 45.96                                  | -0.21                                      | 0.65                                       | 51       | $\text{HS-Fe}^{+3}\text{S}_4\text{O}_2$ |
| Doublet           |                                        | 1.27                                       | 0.44                                       | 6        | $\text{HS-Fe}^{+3}\text{O}_6$           |

## 11. Electrochemical evaluation

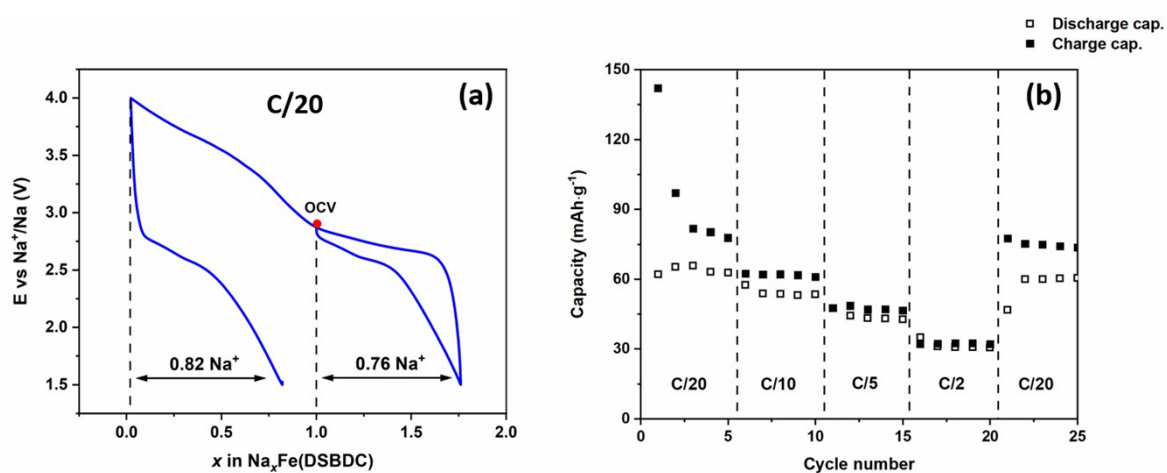

**Figure S22.** Electrochemical behavior of  $\text{Na}\{\text{Fe}(\text{DSBDC})\}$  in a half-cell vs. Na cycled in a voltage range of 1.5–4.0 V vs.  $\text{Na}^+/\text{Na}$ . a) Potential vs. number of inserted/extracted  $\text{Na}^+$  in the first cycle at C/20 current rate. b) Charge/discharge capacity at different current rates.

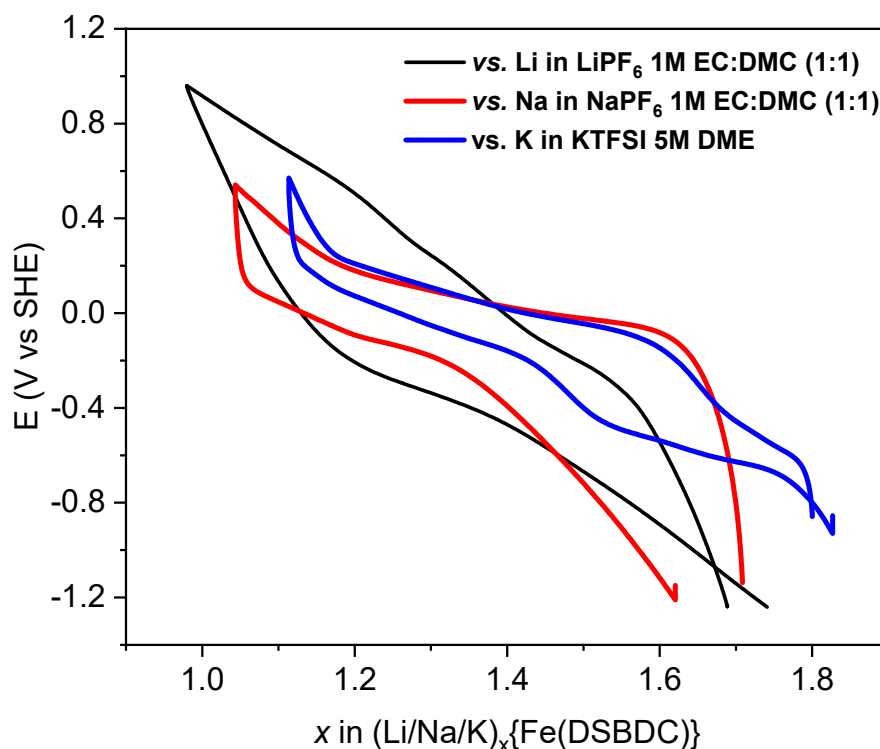

**Figure S23.** Comparison of the potential vs. number of inserted/extracted alkali cations during the first electrochemical cycle for the three alkali. The voltage axis refers to standard hydrogen electrode (SHE) .

## References

- (1) Vial, L.; Ludlow, R. F.; Leclaire, J.; Pérez-Fernandez, R.; Otto, S. Controlling the Biological Effects of Spermine Using a Synthetic Receptor. *J. Am. Chem. Soc.* **2006**, *128* (31), 10253–10257. <https://doi.org/10.1021/ja062536b>.
- (2) Du, S.; Cui, M.; He, Z. Approach toward Iron(II) Coordination Polymers Based on Chain Motifs with Thiolate or Mixed Thiolate/Carboxylate Bridges: Structures and Magnetic Properties. *Inorg. Chem.* **2021**, *60* (24), 19053–19061. <https://doi.org/10.1021/acs.inorgchem.1c02905>.
- (3) Sun, L.; Hendon, C. H.; Minier, M. A.; Walsh, A.; Dincă, M. Million-Fold Electrical Conductivity Enhancement in Fe 2 (DEBDC) versus Mn 2 (DEBDC) (E = S, O). *J. Am. Chem. Soc.* **2015**, *137* (19), 6164–6167. <https://doi.org/10.1021/jacs.5b02897>.
- (4) Férey, G.; Millange, F.; Morcrette, M.; Serre, C.; Doublet, M.-L.; Grenèche, J.-M.; Tarascon, J.-M. Mixed-Valence Li/Fe-Based Metal–Organic Frameworks with Both Reversible Redox and Sorption Properties. *Angew. Chemie Int. Ed.* **2007**, *46* (18), 3259–3263. <https://doi.org/10.1002/anie.200605163>.
- (5) Fateeva, A.; Horcajada, P.; Devic, T.; Serre, C.; Marrot, J.; Grenèche, J. M.; Morcrette, M.; Tarascon, J. M.; Maurin, G.; Férey, G. Synthesis, Structure, Characterization, and Redox Properties of the Porous MIL-68(Fe) Solid. *Eur. J. Inorg. Chem.* **2010**, *68* (24), 3789–3794. <https://doi.org/10.1002/ejic.201000486>.
- (6) Yamada, T.; Shiraishi, K.; Kitagawa, H.; Kimizuka, N. Applicability of MIL-101(Fe) as a

Cathode of Lithium Ion Batteries. *Chem. Commun.* **2017**, 53 (58), 8215–8218.  
<https://doi.org/10.1039/C7CC01712J>.

- (7) Sava Gallis, D. F.; Pratt III, H. D.; Anderson, T. M.; Chapman, K. W. Electrochemical Activity of Fe-MIL-100 as a Positive Electrode for Na-Ion Batteries. *J. Mater. Chem. A* **2016**, 4 (36), 13764–13770. <https://doi.org/10.1039/C6TA03943J>.
